# Supplementary material for: A Systematic Review and Meta-Analysis on Rectus Capitis Posterior Minor (RCPm) Inhibition Versus Standard Physiotherapy in EnhancingProprioception, Reducing Pain, and Improving Motor Control in Upper Cervical Dysfunction (C1-C2)
Source: Research Square preprint supplement (doi:10.21203/rs.3.rs-8105928/v1), 2025-12-02
Supplement: Supplementary file 1 [file 970eb297d75b40028ab5413d.docx]

**Table 1: Proprioception Improvement Outcomes from Included Studies**

| **Study** | **Sample Size** | **Intervention Type** | **Comparator** | **Proprioception Outcome Measure** | **Effect on Proprioception (Mean Change)** | **Statistical Significance (p-value)** |
| --- | --- | --- | --- | --- | --- | --- |
| Jull et al. (2008) [11] | 60 | RCPm inhibition + PT | Standard PT | Joint Position Error | Reduced error by 2.5 degrees | <0.01 |
| Peng et al. (2021) [3] | 75 | Targeted suboccipital inhibition | Conventional therapy | Cervical Kinesthetic Sensibility | Increased accuracy by 18% | <0.001 |
| Scalabrini et al. (2019) [6] | 40 | Myofascial release targeting RCPm | Manual therapy only | Balance test (sway reduction) | 30% improvement in stability | <0.05 |
| Duray et al. (2021) [17] | 50 | Sensorimotor training including RCPm inhibition | Exercise alone | Joint Position Error | Decrease in JPE by 2.0 degrees | <0.01 |
| Winter et al. (2022) [16] | 65 | Proprioceptive retraining with RCPm focus | Standard exercise | Cervical proprioception test | Improved accuracy by 25% | <0.001 |
| Stanton et al. (2016) [5] | 48 | Manual inhibition + PT | Standard PT | Head repositioning accuracy | Significant reduction in error | <0.01 |
| Liu et al. (2012) [10] | 42 | RCPm inhibition + neuromuscular retraining | Conventional care | Postural stability test | Improved sway parameters | <0.05 |

**Table 2: Pain Reduction Outcomes from Included Studies**

| **Study** | **Sample Size** | **Intervention Type** | **Comparator** | **Pain Outcome Measure** | **Effect on Pain (Mean Change)** | **Statistical Significance (p-value)** |
| --- | --- | --- | --- | --- | --- | --- |
| Scalabrini et al. (2019) [6] | 40 | RCPm inhibition + PT | Manual therapy only | Visual Analogue Scale (VAS) | 35% pain reduction | <0.01 |
| Duray et al. (2021) [17] | 50 | Targeted inhibition + PT | Exercise alone | VAS, Neck Disability Index | 30% pain reduction | <0.001 |
| Jull et al. (2008) [11] | 60 | RCPm inhibition + PT | Standard physiotherapy | VAS | Reduction by 20 mm | <0.05 |
| Peng et al. (2021) [3] | 75 | Suboccipital muscle therapy | Conventional therapy | VAS | 25% reduction | <0.001 |
| Liu et al. (2012) [10] | 42 | Manual RCPm inhibition | Neuromuscular retraining | VAS | 33% reduction | <0.05 |
| Winter et al. (2022) [16] | 65 | Proprioceptive training including RCPm inhibition | Standard exercise | VAS | 28% pain reduction | <0.001 |
| Stanton et al. (2016) [5] | 48 | RCPm inhibition + PT | Standard care | VAS | Significant pain decrease | <0.01 |
| Michiels et al. (2019) [13] | 55 | Manual therapy including RCPm focus | Usual care | VAS, NDI | 30% pain reduction | <0.001 |
| Jull et al. (2020) [19] | 58 | RCPm inhibition + PT | Sham therapy | VAS | 35% improvement | <0.01 |

**Table 3: Motor Control Enhancement Outcomes**

| **Study** | **Sample Size** | **Intervention Type** | **Comparator** | **Motor Control Measures** | **Key Outcomes** | **Statistical Significance (p-value)** |
| --- | --- | --- | --- | --- | --- | --- |
| Jull et al. (2008) [11] | 60 | RCPm inhibition + PT | Standard physiotherapy | Cervical Range of Motion (CROM) | Increased cervical ROM by 15° | <0.01 |
| Scalabrini et al. (2019) [6] | 40 | Myofascial release targeting RCPm | Manual therapy only | Electromyography (EMG) | Enhanced neck muscle activation timing | <0.05 |
| Winter et al. (2022) [16] | 65 | Proprioceptive training including RCPm inhibition | Standard exercise | Dynamic balance, motor coordination | Improved postural stability by 25% | <0.001 |
| Peng et al. (2021) [3] | 75 | RCPm-focused neuromuscular retraining | Conventional therapy | EMG, CROM | Improved activation and neck mobility | <0.01 |
| Duray et al. (2021) [17] | 50 | Sensorimotor training w/ RCPm inhibition | Exercise alone | Functional motor tests | Enhanced head-neck coordination | <0.01 |
| Stanton et al. (2016) [5] | 48 | RCPm inhibition + PT | Standard care | CROM, coordination assessments | Increased motor control accuracy | <0.01 |

**Table 4: Meta-Analysis Results**

| Outcome | Number of Studies | Effect Size (SMD) | 95% Confidence Interval | Heterogeneity (I²) | P-value |
| --- | --- | --- | --- | --- | --- |
| Proprioception Improvement | 7 | 0.65 | 0.40 to 0.90 | 45% | <0.001 |
| Pain Reduction | 9 | 0.78 | 0.55 to 1.01 | 52% | <0.001 |
| Motor Control Enhancement | 6 | 0.70 | 0.45 to 0.95 | 48% | <0.001 |
